# Supplementary material for: IL-6/STAT3 pathway induced deficiency of RFX1 contributes to Th17-dependent autoimmune diseases via epigenetic regulation
Source: PubMed Central journal article supplement (PMC5805701; doi:10.1038/s41467-018-02890-0), 2018-02-08
Supplement: 41467_2018_2890_MOESM1_ESM.pdf [file 41467_2018_2890_MOESM1_ESM.pdf]

**IL-6/STAT3 pathway induced deficiency of RFX1 contributes to Th17-dependent autoimmune diseases via epigenetic regulation**

**Zhao et al.**

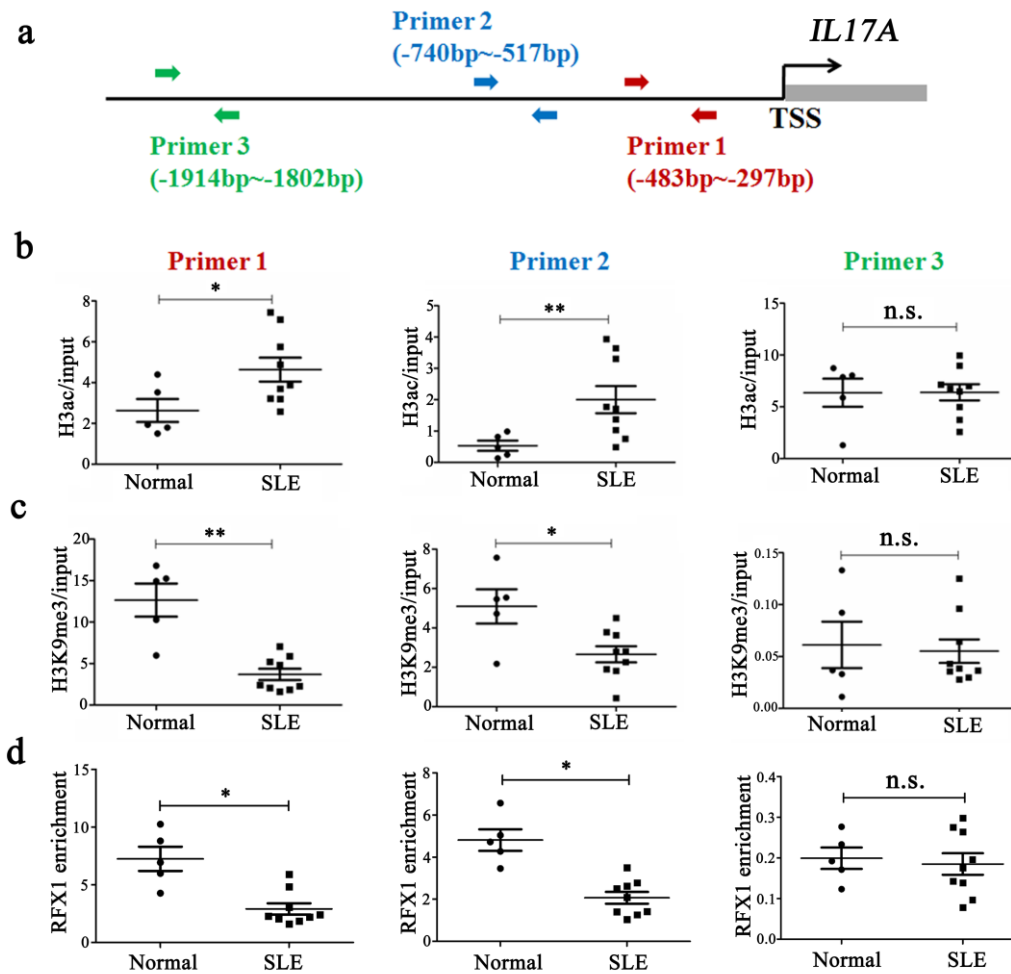

**Supplementary Figure 1** The levels of histone H3 acetylation, H3K9 tri-methylation and RFX1 enrichment in the promoter of *IL17A* in  $CD4^+$  T cells of SLE patients (n=9) and normal controls (n=5). (a) The locations of three pairs of primers for ChIP-qPCR. Primer 1 and Primer 2 are close to the RFX1 binding sites, whereas Primer 3 is far away from the RFX1 binding site. (b-d) ChIP-qPCR analysis of H3 acetylation levels (b), H3K9 tri-methylation levels (c) and RFX1 enrichment levels (d) in the promoter region 2000 bp upstream of the transcription start site (TSS) of the *IL17A* gene. Small horizontal lines indicate the mean ( $\pm$  s.e.m.) in the (b), (c) and (d). \* $P < 0.05$  and \*\* $P < 0.01$ , compared between the indicated groups. n.s., not significant. P-values were determined using two-tailed Student's *t*-tests and Mann-Whitney U test.

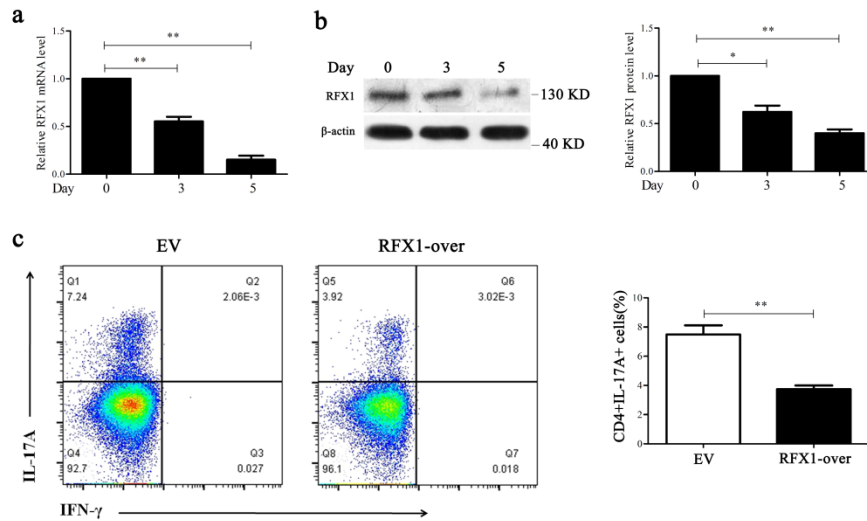

**Supplementary Figure 2 RFX1 regulates human Th17 differentiation in vitro.** (a) qPCR analysis of RFX1 expression in induced Th17 cells polarized with Th17-polarizing conditions on day 3 and day 5; results are presented relative to RFX1 expression in naïve T cells. (b) Representative western blot of RFX1 protein in induced Th17 cells on day 3 and day 5; results are presented relative to RFX1 expression in naïve T cells. (c) Representative flow cytometry plots of CD4<sup>+</sup>IL-17A<sup>+</sup>T cells in induced Th17 cells on day 3 post-transfection with RFX1 expression vector (RFX1-over) or empty expression vector (EV). Numbers adjacent to outlined areas indicate the percentage of cells in each. Data are representative of three independent experiments (mean  $\pm$  s.d.; n=3). \*P<0.05 and \*\*P<0.01, compared between the indicated groups. P-values were determined using two-tailed Student's *t*-tests.

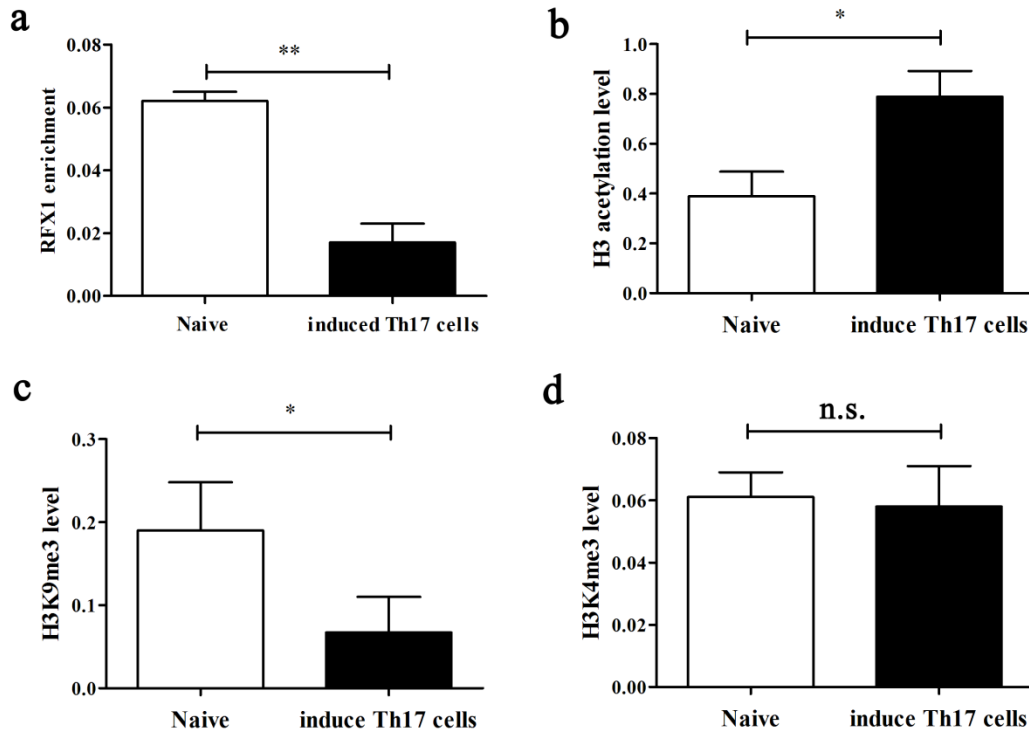

**Supplementary Figure 3 The levels of RFX1 enrichment, histone H3 acetylation, H3K9 tri-methylation and H3K4 tri-methylation in the promoter of *IL17A*.** (a-d) ChIP-qPCR analysis of the levels of RFX1 enrichment, H3 acetylation, H3K9me3 and H3K4me3 in the promoter of *IL17A* in the induced Th17 cells, relative to the levels in naive T cells. Data are representative of three independent experiments (mean  $\pm$  s.d.; n=3). \*P<0.05 and \*\*P<0.01, compared with the indicated groups. n.s., not significant. P-values were determined using two-tailed Student's *t*-tests.

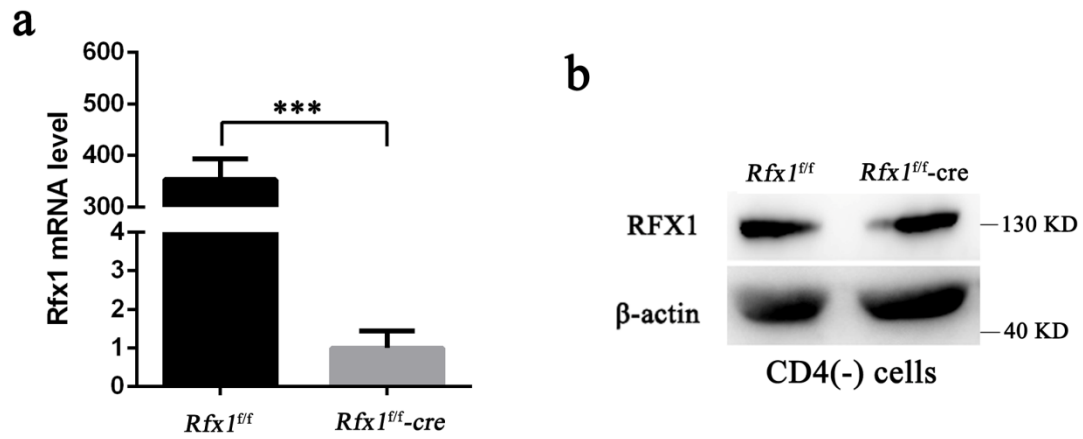

**Supplementary Figure 4 Rfx1 expression in conditional knockout mice.** (a) qPCR analysis of the relative mRNA expression level of Rfx1 in CD4<sup>+</sup> T cells from *Rfx1<sup>fl/fl</sup>* and *Rfx1<sup>fl/fl-cre</sup>* mice. (b) Representative western blot for Rfx1 protein in CD4<sup>(-)</sup> T cells from *Rfx1<sup>fl/fl</sup>* and *Rfx1<sup>fl/fl-cre</sup>* mice. Data are representative of three independent experiments (mean  $\pm$  s.d.; n=3). \*\*\*P<0.001, compared between the indicated groups. P-values were determined using two-tailed Student's *t*-tests.

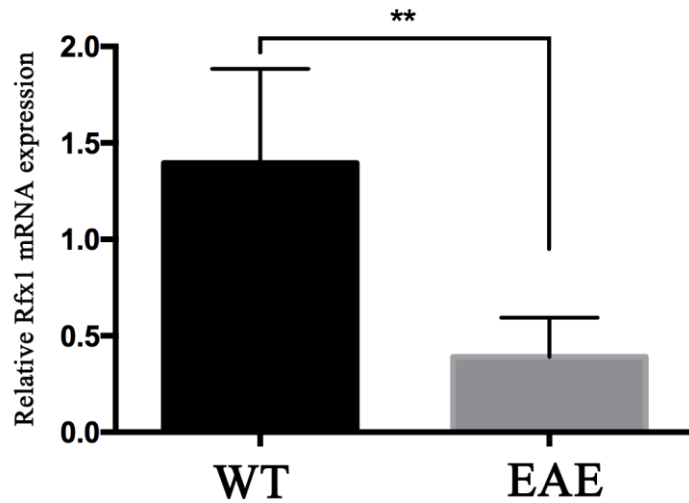

**Supplementary Figure 5 Rfx1 expression in CD4<sup>+</sup> T cells of EAE mice.** qPCR analysis of the relative mRNA expression level of Rfx1 in CD4<sup>+</sup> T cells from EAE mice on day 19 and wild-type (WT) mice. Data are representative of two independent experiments (mean ± s.d.; n=5). \*\*P<0.01, compared with the indicated groups. P-values were determined using two-tailed Student's *t*-tests.

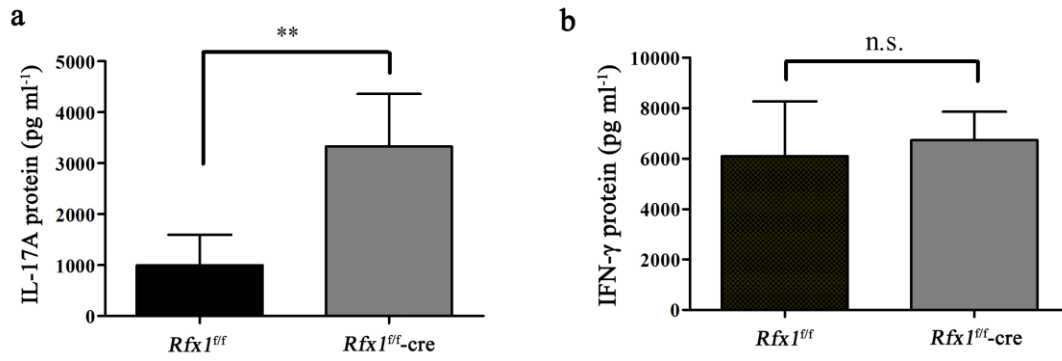

**Supplementary Figure 6 Secretion of IL-17A and IFN- $\gamma$  proteins from splenocyte cells with MOG35-55 re-stimulation.** Splenocyte were isolated from spleen of *Rfx1<sup>fl/fl</sup>* and *Rfx1<sup>fl/fl-cre</sup>* mice immunized with MOG35-55 at day 19 and further cultured in vitro with MOG35-55 (30  $\mu$ g) for 3 days. IL-17A (**a**) and IFN- $\gamma$  (**b**) concentrations in culture supernatant were measured by ELISA. Data are representative of two independent experiments (mean  $\pm$  s.d.; n=5). \*\*P<0.01; n.s., not significant, two-tailed Student's *t*-test.

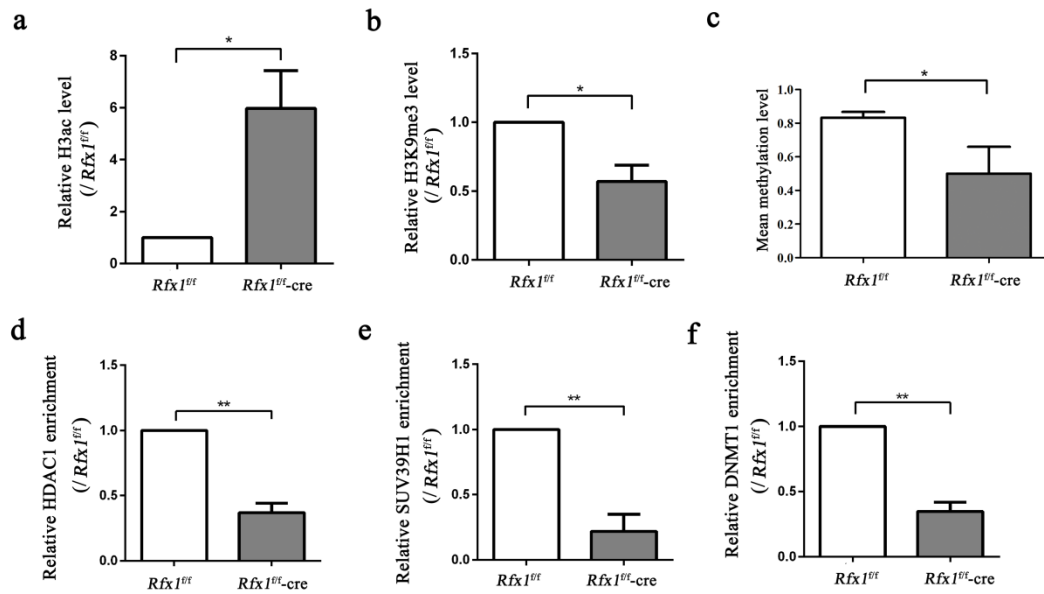

**Supplementary Figure 7 The levels of histone H3 acetylation, H3K9 tri-methylation and the enrichment of HDAC1, SUV39H1 and DNMT1 in the promoter of *I17a* in conditional knockout mice.** (a, b) ChIP-qPCR analysis of the levels of H3 acetylation (a) and H3K9me3 (b) in the promoter of *I17a* in CD4<sup>+</sup> T cells of *Rfx1<sup>f/f</sup>* and *Rfx1<sup>f/f</sup>-cre* mice. (c) the mean methylation levels of 4 CG pairs in mouse *I17a* promoter (217bp, 201bp, 117bp and 90bp upstream of transcription start site) in CD4<sup>+</sup> T cells of *Rfx1<sup>f/f</sup>* and *Rfx1<sup>f/f</sup>-cre* mice. (d-f) ChIP-qPCR analysis of the enrichment of HDAC1 (d), SUV39H1 (e) and DNMT1 (f) in the promoter of *I17a* in CD4<sup>+</sup> T cells of *Rfx1<sup>f/f</sup>* and *Rfx1<sup>f/f</sup>-cre* mice. The levels in *Rfx1<sup>f/f</sup>* groups were set to "1". The fold-changes were calculated relative to the *Rfx1<sup>f/f</sup>* groups. Data are representative of three independent experiments (mean  $\pm$  s.d.; n=3). \*P<0.05 and \*\*P<0.01, compared between the indicated groups. P-values were determined using two-tailed Student's *t*-tests.



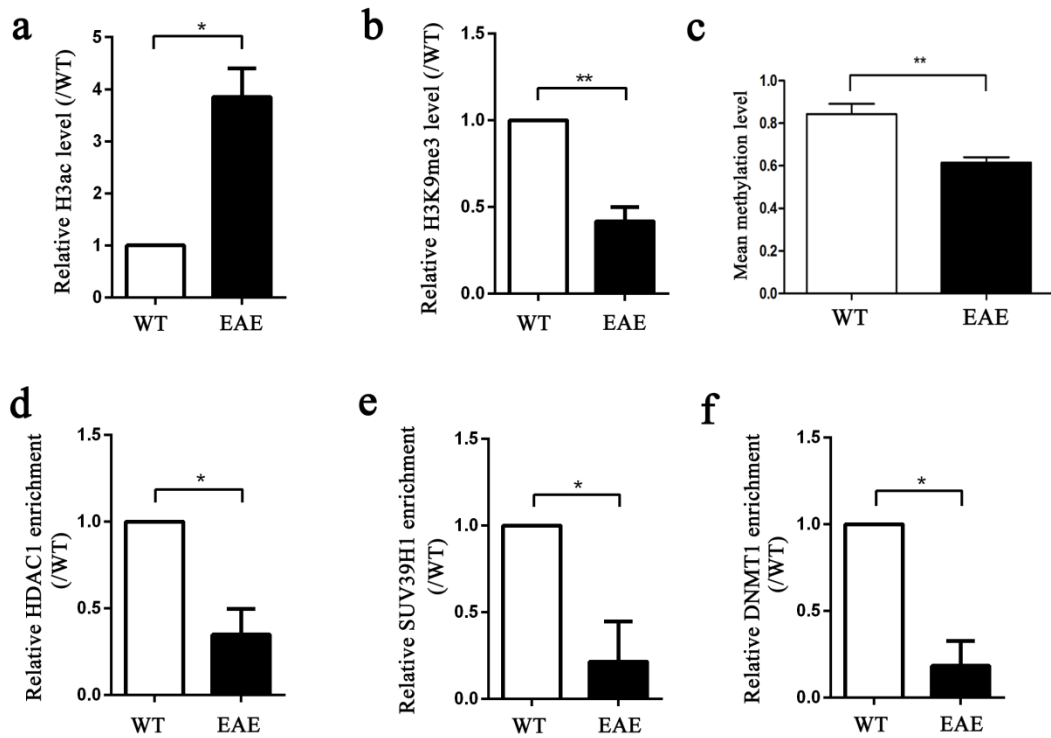

**Supplementary Figure 8** The levels of histone H3 acetylation, H3K9 tri-methylation and the enrichment of HDAC1, SUV39H1 and DNMT1 in the *I17a* promoter in EAE mice. (a, b) ChIP-qPCR analysis of the levels of H3 acetylation (a) and H3K9me3 (b) in the promoter of *I17a* in CD4<sup>+</sup> T cells of EAE mice on day 19 and wild-type mice. (c-e) ChIP-qPCR analysis of the enrichment of HDAC1 (d), SUV39H1 (e) and DNMT1 (f) in the promoter of *I17a* in CD4<sup>+</sup> T cells of EAE mice on day 19 and wild-type (WT) mice. The levels in WT groups were set to "1". The fold-changes were calculated relative to WT groups. Data are representative of three independent experiments (mean  $\pm$  s.d.; n=3). \*P<0.05 and \*\*P<0.01, compared between the indicated groups. P-values were determined using two-tailed Student's *t*-tests.

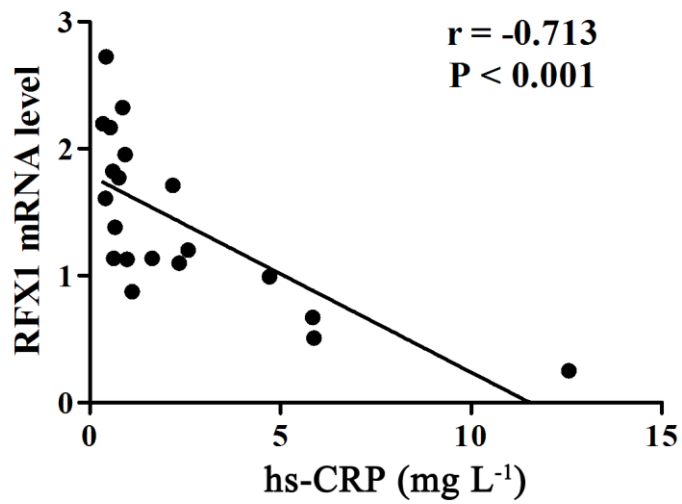

**Supplementary Figure 9 The correlation between RFX1 expression levels and serum CRP levels.** RFX1 mRNA expression levels in CD4<sup>+</sup> T cells and high-sensitivity CRP levels in serum were measured in SLE patients with active arthritis (n=20). Pearson's correlation coefficient was used for the correlation analysis (two-tailed).

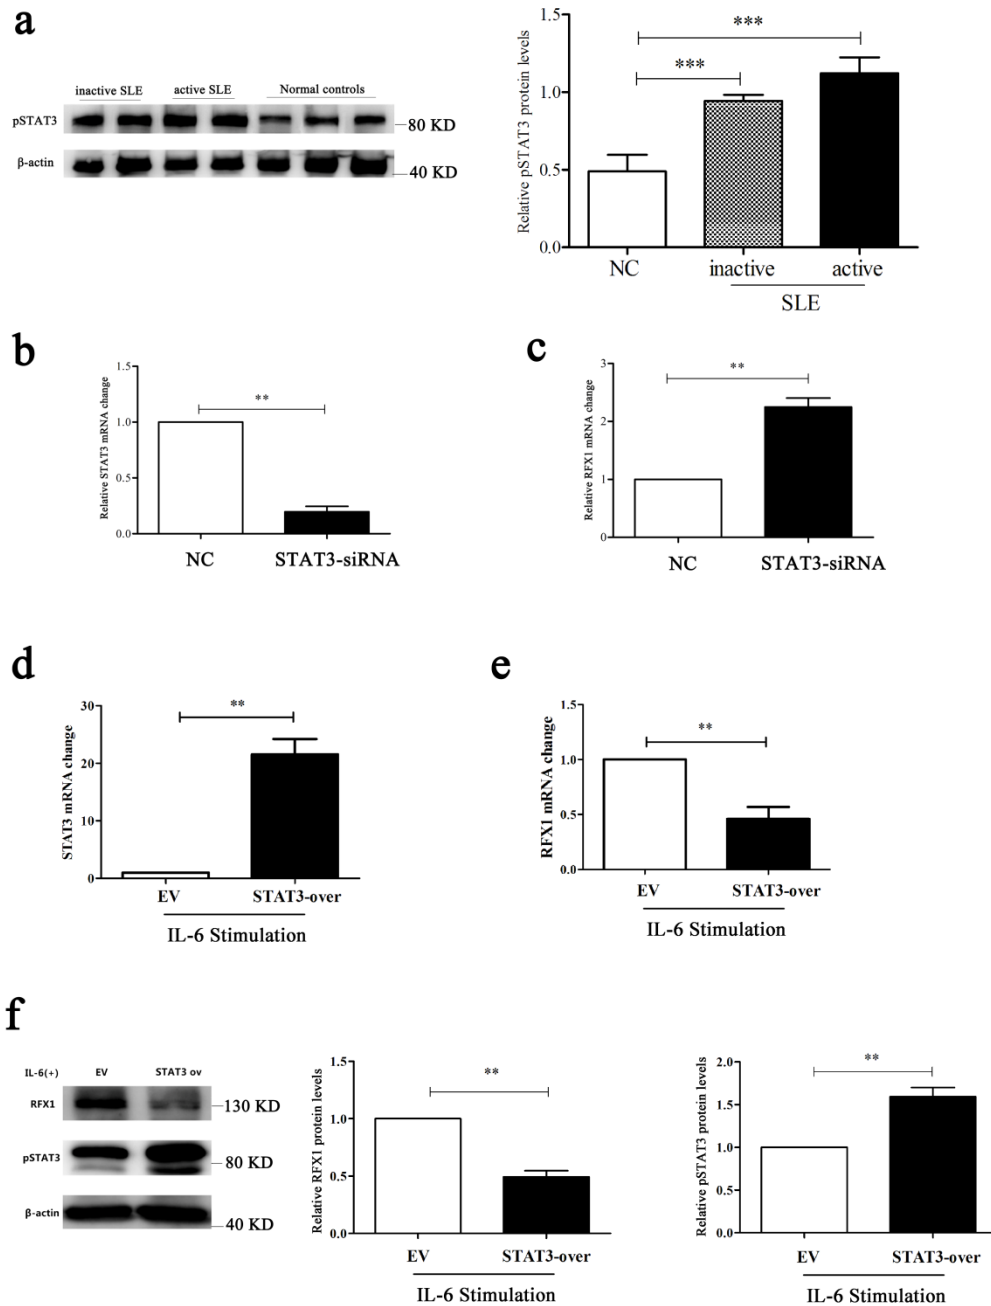

**Supplementary Figure 10 STAT3 regulates RFX1 expression.** (a) Western blot analysis of phosphorylated STAT3 (pSTAT3) protein levels in CD4<sup>+</sup> T cells of inactive (n=8) and active (n=16) SLE patients and healthy controls (n=12). (b, c) RT-qPCR analysis of STAT3 and RFX1 mRNA expression in CD4<sup>+</sup> T cells transfected with STAT3 siRNA or negative control. (d, e) RT-qPCR analysis of STAT3 and RFX1 mRNA expression in CD4<sup>+</sup> T cells transfected with STAT3 expression vector (STAT3-over) or empty control vector (EV) under IL-6 stimulation. (f) changes of pSTAT3 and RFX1 proteins in CD4<sup>+</sup> T cells transfected with STAT3 expression vector (STAT3-over) or empty control vector (EV) under IL-6 stimulation. Data are representative of three independent experiments (mean ± s.d.; n=3; b-f). \*P<0.05, \*\*P<0.01 and \*\*\*P<0.001, compared between the indicated groups. P-values were determined using two-tailed Student's *t*-tests.

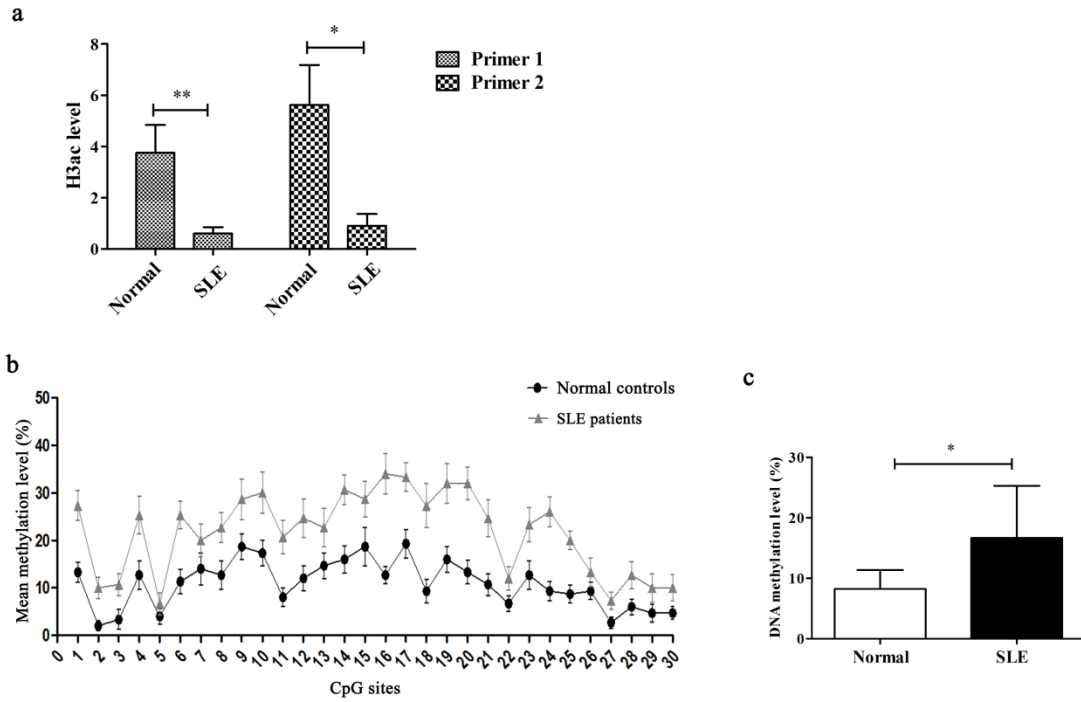

**Supplementary Figure 11 Histone acetylation levels and DNA methylation levels in intron 7 of the *RFX1* gene.** (a) ChIP-qPCR analysis of H3 acetylation levels of intron 7 in CD4<sup>+</sup> T cells of SLE patients (n=8) and normal controls (n=8). (b, c) BSP analysis of DNA methylation levels of the CpG island in intron 7 in CD4<sup>+</sup> T cells of SLE patients (n=15) and healthy controls (n=15). The methylation level of each CpG site (b) and mean methylation levels of all CpG sites (c). Data are mean  $\pm$  s.d. \*P<0.05 and \*\*P<0.01, compared between the indicated groups. P-values were determined using two-tailed Student's *t*-tests.

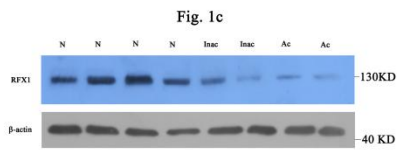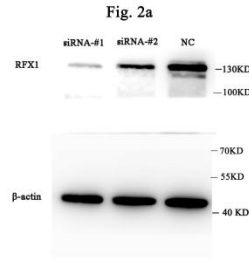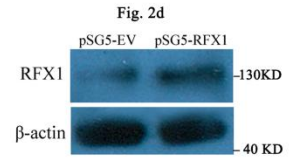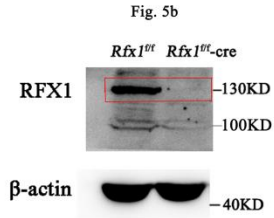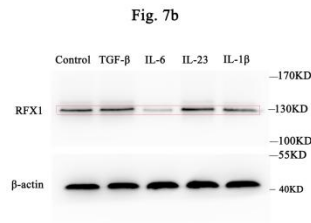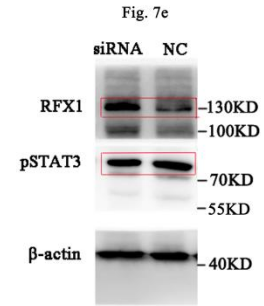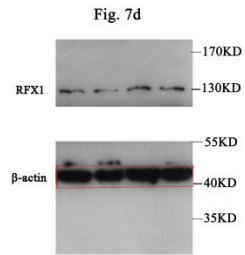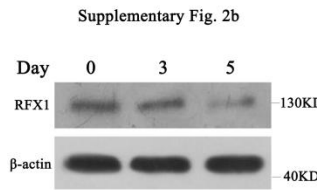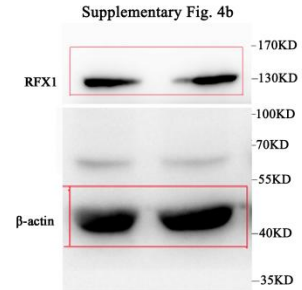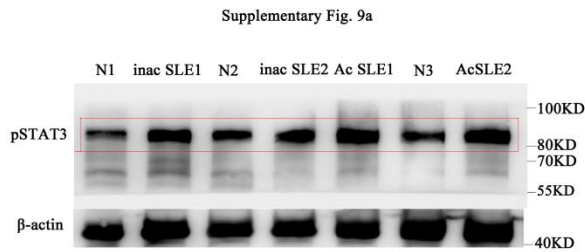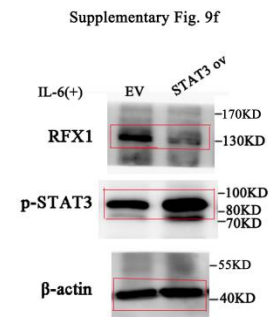

Supplementary Figure 12 Uncropped scans of blots.

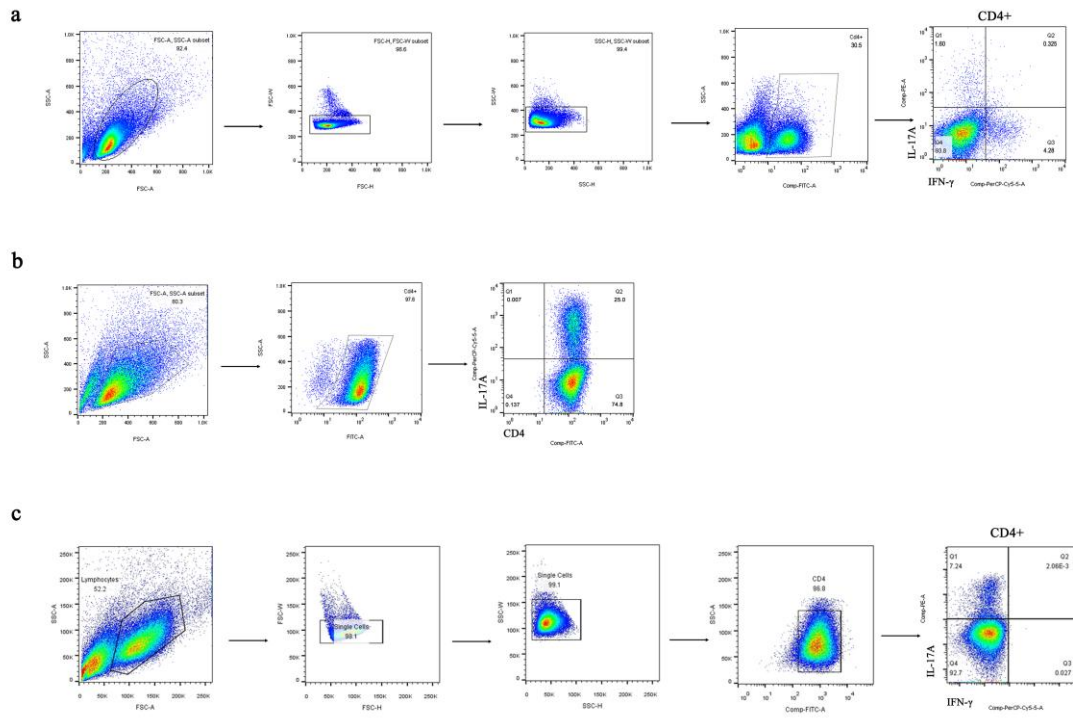

**Supplementary figure 13 Flow Cytometry gating strategies.** (a) Murine splenocytes and lymph nodes stained for CD4, IL-17A and IFN- $\gamma$  as shown in Figure 5e and Figure 7g. (b) Murine Th17 cells induced in vitro stained for CD4 and IL-17A as shown in Figure 6. (c) Human Th17 cells induced in vitro stained for CD4 and IL-17A as shown in Supplementary figure 2c.

**Supplementary Table 1. Demographic information for SLE patients.**

| SLE      | Age (year) | Sex    | SLEDAI* | hs-CRP(mg L <sup>-1</sup> ) |
|----------|------------|--------|---------|-----------------------------|
| lupus 1  | 49         | Female | 0       | /                           |
| lupus 2  | 24         | Female | 4       | /                           |
| lupus 3  | 32         | Female | 2       | /                           |
| lupus 4  | 47         | Female | 6       | /                           |
| lupus 5  | 44         | Female | 4       | /                           |
| lupus 6  | 42         | Female | 4       | /                           |
| lupus 7  | 24         | Female | 0       | /                           |
| lupus 8  | 41         | Female | 2       | /                           |
| lupus 9  | 50         | Female | 6       | /                           |
| lupus 10 | 47         | Female | 14      | /                           |
| lupus 11 | 30         | Female | 6       | /                           |
| lupus 12 | 27         | Female | 10      | /                           |
| lupus 13 | 38         | Female | 11      | /                           |
| lupus 14 | 17         | Female | 16      | /                           |
| lupus 15 | 24         | Female | 24      | /                           |
| lupus 16 | 49         | Female | 6       | /                           |
| lupus 17 | 45         | Female | 10      | /                           |
| lupus 18 | 22         | Female | 10      | /                           |
| lupus 19 | 59         | Female | 12      | /                           |
| lupus 20 | 39         | Female | 8       | /                           |
| lupus 21 | 21         | Female | 16      | /                           |
| lupus 22 | 19         | Female | 12      | /                           |
| lupus 23 | 33         | Female | 18      | /                           |
| lupus 24 | 34         | Female | 16      | /                           |
| lupus 25 | 45         | Female | 18      | /                           |
| lupus 26 | 23         | Female | 23      | /                           |
| lupus 27 | 23         | Female | 8       | /                           |
| lupus 28 | 31         | Female | 28      | /                           |
| lupus 29 | 40         | Female | 5       | /                           |
| lupus 30 | 20         | Female | 12      | /                           |
| lupus 31 | 46         | Female | 15      | /                           |
| lupus 32 | 22         | Female | 7       | /                           |
| lupus 33 | 41         | Female | 20      | /                           |
| lupus 34 | 25         | Female | 4       | /                           |
| lupus 35 | 32         | Female | 2       | /                           |
| lupus 36 | 47         | Female | 4       | /                           |
| lupus 37 | 39         | Female | 2       | /                           |
| Lupus38  | 33         | Female | 14      | /                           |
| Lupus39  | 41         | Female | 16      | /                           |
| Lupus40  | 34         | Female | 10      | /                           |

|         |    |        |    |       |
|---------|----|--------|----|-------|
| Lupus41 | 18 | Female | 6  | /     |
| Lupus42 | 21 | Female | 21 | /     |
| Lupus43 | 23 | Female | 2  | /     |
| Lupus44 | 25 | Female | 6  | /     |
| Lupus45 | 27 | Female | 9  | /     |
| Lupus46 | 30 | Female | 13 | /     |
| Lupus47 | 40 | Female | 14 | /     |
| Lupus48 | 18 | Female | 14 | /     |
| Lupus49 | 35 | Female | 16 | /     |
| Lupus50 | 25 | Female | 17 | /     |
| Lupus51 | 34 | Female | 18 | /     |
| Lupus52 | 46 | Female | 18 | /     |
| Lupus53 | 18 | Female | 24 | /     |
| Lupus54 | 41 | Female | 4  | /     |
| Lupus55 | 21 | Female | 2  | /     |
| Lupus56 | 28 | Female | 0  | /     |
| Lupus57 | 31 | Female | 1  | /     |
| Lupus58 | 35 | Female | 4  | /     |
| Lupus59 | 23 | Female | 4  | /     |
| Lupus60 | 46 | Female | 10 | /     |
| Lupus61 | 43 | Female | 10 | 0.54  |
| Lupus62 | 35 | Female | 12 | 1.11  |
| Lupus63 | 16 | Female | 17 | 2.58  |
| Lupus64 | 45 | Female | 14 | 0.93  |
| Lupus65 | 63 | Male   | 11 | 4.71  |
| Lupus66 | 52 | Female | 16 | 2.35  |
| Lupus67 | 48 | Male   | 4  | 0.98  |
| Lupus68 | 44 | Female | 10 | 0.76  |
| Lupus69 | 31 | Female | 15 | 0.35  |
| Lupus70 | 24 | Female | 20 | 5.85  |
| Lupus71 | 24 | Female | 27 | 0.41  |
| Lupus72 | 41 | Female | 8  | 0.63  |
| Lupus73 | 26 | Female | 11 | 1.64  |
| Lupus74 | 29 | Female | 4  | 0.43  |
| Lupus75 | 23 | Female | 10 | 0.6   |
| Lupus76 | 54 | Female | 10 | 0.66  |
| Lupus77 | 57 | Female | 6  | 2.18  |
| Lupus78 | 43 | Female | 6  | 12.56 |
| Lupus79 | 28 | Female | 25 | 0.86  |
| Lupus80 | 50 | Female | 19 | 5.88  |

\* SLEDAI: SLE Disease Activity Index; hs-CRP: high sensitive C-Reactive Protein



**Supplementary Table 2. RT-qPCR primers**

| Gene           | species | Forward                | Reverse                  |
|----------------|---------|------------------------|--------------------------|
| <i>RFX1</i>    | human   | GATCCAAGGCGGCTACAT     | CAGCCGTCTCATAGTTGTCC     |
| <i>IL17A</i>   | human   | AATCTCCACCGCAATGAGGACC | TGCTGGATGGGGACAGAGTTCA   |
| <i>IL17F</i>   | human   | AGTAAGCCACCAGCGCAACATG | CTCAGAAAGGCAAGCCCCAATA   |
| <i>RORC</i>    | human   | AGGCCATTCAGTACGTGGTGGA | CGTGCGGTTGTCAGCATTGTAG   |
| <i>STAT3</i>   | human   | GGAGGAGGCATTCGGAAAAG   | TCGTTGGTGTCCACACAGAT     |
| <i>β-actin</i> | human   | GAGCTACGAGCTGCCTGACG   | GTAGTTTCGTGGATGCCACAG    |
| <i>GAPDH</i>   | human   | ATGGGGAAGGTGAAGGTCTG   | GGGGTCATTGATGGCAACAATA   |
| <i>Il17a</i>   | mouse   | CTCACACGAGGCACAAG      | CTCAGCAGCAGCAACAG        |
| <i>Il17f</i>   | mouse   | GGGAAGAAGCAGCCATTG     | TCCAGGGGAGGACAGTT        |
| <i>Rfx1</i>    | mouse   | GTCAGAAGCCAGCCCCAGTT   | CTTACCTGCTGTGGCACCTGAATG |
| <i>Rorc</i>    | mouse   | GGACAGGGAGCCAAGTTCTCA  | CACAGGTGATAACCCCGTAGTGG  |
| <i>Il23r</i>   | mouse   | GCAGGAAGTATTTGGTATGGG  | GAAATGATGGACGCAGAAGG     |
| <i>β-actin</i> | mouse   | CTGAGAGGGAAATCGTGCGT   | AACCGCTCGTTGCCAATAGT     |

**Supplementary Table 3. PCR primers for site-directed mutant plasmids.**

| name      | Forward                                 | Reverse                             |
|-----------|-----------------------------------------|-------------------------------------|
| Mu(site1) | ATCCTTCCCCTTTCCCAGCCCCCTGGCAG<br>CTCAGG | GGGGCTGGGAAAGGGGAAGGATGTA           |
| Mu(site2) | GATTCCAAGTTCTGTCCCACCAACCGGG<br>GCC     | GGACAGAACTTGAATCACTGACAGGGCC<br>TTA |
| Mu(site3) | TGTGCCCGGTTTCCAAGCCCCACCCCTG<br>AGGCC   | CTTGAAACCGGGCACAGGATGTGAGGGG<br>CGG |

**Supplementary Table 4. ChIP-qPCR primers**

| Gene                  | species | Forward                       | Reverse                   |
|-----------------------|---------|-------------------------------|---------------------------|
| <i>IL17A</i> -Primer1 | human   | CTAGTTCTCATCACTCTCTACTCC<br>C | ATTGAATTTAACAATTCTTTTGTG  |
| <i>IL17A</i> -Primer2 | human   | TTCATTTTTTGTTTACTTATATGA<br>T | GAGTTATGCTCTATTTTAATGGTTC |
| <i>IL17A</i> -Primer3 | human   | TCCTGGAGCATGGTGGGGGGTAA<br>GG | TTCTTCTGCCATTAGCTTGCATACA |
| <i>RFX1</i> -Primer1  | human   | CAGACACTGCCCTACATCCTTC        | TCGGAGAGGGGTTAGAAGTAC     |
| <i>RFX1</i> -Primer2  | human   | TGATTCCAGGTTCTGTCCCACC        | GGAGCTACAGAAAGGGCCTCAG    |
| <i>Il17a</i>          | mouse   | GAGTGGGTTTCTTTGGGCAA          | AGCATGACTTCTTGGGAGCT      |

**Supplementary Table 5. BSP primers**

| Gene         | species | Forward                         | Reverse                          |
|--------------|---------|---------------------------------|----------------------------------|
| <i>IL17A</i> | human   | Outer: TGGTTAAGGAATTGTGAGGA     | Outer: TCTCCATAATCAAAACCCAAC     |
|              |         | Inter: AATTTTGTTTTTTTTATTTTTTTT | Inter: AAAACTCACCACCAATAAAATCTTC |
| <i>RFX1</i>  | human   | Outer: GGTTTTGGGTTAGTTTAAATTTTT | Outer: TTCTCTAAATCCTAACCCCTCTAA  |
|              |         | Inter: GGTGGAGGTTTGGAGTTT       | Inter: ACAAAAACAAATATAAAAACAACA  |
| <i>Il17a</i> | mouse   | Outer: AGTTAGGGAATTTGGTAGAAAAGT | Outer: AGTGCAGGACTCACCACAGA      |
|              |         | Inter: AAGTGTGTGTTATTAGGAGATTGT | Inter: ATGAAGCTCTCCCTAAACTCA     |
